# Supplementary material for: Assessment of patient satisfaction in a language-concordant palliative cancer care program in a resource- limited setting: A cross-sectional study
Source: Research Square preprint supplement (doi:10.21203/rs.3.rs-7843181/v1), 2025-11-06
Supplement: Supplementary file 1 [file a9107d68a4f9446d573a1819.xlsx]

## Sheet: Table1
Table 1. Patient characteristics at baseline.
Characteristics	All patients, N (%)	P-value
No. of patients	82
Age at diagnosis		0.128
Median	52
Range	31 - 98
Age group, years		0.917
<50	30 (37)
≥50	52 (63)
ECOG performance status		0.885
1	30 (37)
2	45 (55)
3	7 (9)
Treatment		0.039
Hormonotherapy	34 (41)
Chemotherapy	34 (41)
Best supportive care	14 (17)
Abbreviations: ECOG, Eastern Cooperative Oncology Group

## Sheet: Table2
Table 2. Symptoms score for each domain at baseline and at 3-month follow-up.
Domain	Baseline				Follow-up (3mo)			P-value
	N	Median (range)	Mean (SD)		N	Median (range)	Mean (SD)
Anxiety	82	4 (2-7)	4.3 (1.3)		82	4 (2-6)	4.1 (1)	0.379		0.379
Apetite	82	6 (2-7)	6 (1.2)		82	4.5 (2-6)	4.4 (1)	<0.0001		1.08e-17	*
Depression	82	5 (2-8)	5.1 (0.8)		82	4.5 (2-7)	4.8 (1.3)	0.0992		0.0992
Dyspnea	82	5 (2-8)	4.8 (1.5)		82	5 (2-7)	5 (1.3)	0.342		0.342
Fatigue	82	5 (4-8)	5.1 (0.9)		82	4 (3-7)	4.1 (1)	<0.0001		9.07e-10	*
Nausea	82	5 (4-8)	5.1 (1.2)		82	4 (3-6)	4.2 (0.8)	<0.0001		2.28e-07	*
Pain	82	5 (3-7)	5 (1.1)		82	5 (2-7)	4.8 (1)	0.179		0.179
Sleep problems	82	5 (2-7)	5 (0.9)		82	5 (2-7)	5.1 (1.4)	0.464		0.464
Sleepness	82	4 (3-8)	4.6 (1.1)		82	5 (2-7)	4.2 (1.3)	0.0506		0.0506
Wellness	82	4 (2-8)	4.4 (1.1)		82	4 (3-6)	4 (0.9)	0.0296		0.0296	*

## Sheet: Table3
Table 3. Percentage distribution of severe symptoms at baseline and follow-up.
Domain	Baseline	Follow-up (3mo)	P-value		pval	sig
Anxiety	7 (9)	0	0.015625		0.015625	*
Apetite	39 (48)	0	<0.0001		3.63798e-12	*
Depression	4 (5)	10 (12)	0.179565		0.179565
Dyspnea	6 (7)	15 (18)	0.0635681		0.0635681
Fatigue	3 (4)	2 (2)	1		1
Nausea	7 (9)	0	0.015625		0.015625	*
Pain	13 (16)	1 (1)	0.000488281		0.000488281	*
Sleep problems	2 (2)	20 (24)	0.000121117		0.000121117	*
Sleepness	6 (7)	1 (1)	0.125		0.125
Wellness	7 (9)	0	0.015625		0.015625	*

## Sheet: Fig1
Figure 1. Distribution of symptoms score at baseline and follow-up for each domain.
